# 1 Amplicon Sequencing of Single-copy Protein-coding Genes Reveals Accurate 2 Diversity for Sequence-discrete Microbiome Populations

3  
4 Chengfeng Yang,<sup>a,b</sup> Qinzhi Su,<sup>a,b</sup> Min Tang,<sup>b</sup> Shiqi Luo,<sup>b</sup> Hao Zheng,<sup>a</sup> Xue Zhang,<sup>b</sup> Xin Zhou<sup>b</sup>

5  
6 <sup>a</sup>College of Food Science and Nutritional Engineering, China Agricultural University, Beijing, China

7 <sup>b</sup>Department of Entomology, College of Plant Protection, China Agricultural University, Beijing, China

8 Address correspondence to Xue Zhang, [zhangxue05@cau.edu.cn](mailto:zhangxue05@cau.edu.cn) or Xin Zhou, [xinzhou@cau.edu.cn](mailto:xinzhou@cau.edu.cn).

9  
10  
11 **ABSTRACT** An in-depth understanding of microbial function and the division of ecological niches  
12 requires accurate delineation and identification of microbes at a fine taxonomic resolution.  
13 Microbial phylotypes are typically defined using a 97% small subunit (16S) rRNA threshold.  
14 However, increasing evidence has demonstrated the ubiquitous presence of taxonomic units of  
15 distinct functions within phylotypes. These so-called sequence-discrete populations (SDPs) have  
16 used to be mainly delineated by disjunct sequence similarity at the whole-genome level. However,  
17 gene markers that could accurately identify and quantify SDPs are lacking in microbial community  
18 studies. Here we developed a pipeline to screen single-copy protein-coding genes that could  
19 accurately characterize SDP diversity via amplicon sequencing of microbial communities. Fifteen  
20 candidate marker genes were evaluated using three criteria (extent of sequence divergence,  
21 phylogenetic accuracy, and conservation of primer regions) and the selected genes were subject to  
22 test the efficiency in differentiating SDPs within *Gilliamella*, a core honeybee gut microbial  
23 phylotype, as a proof-of-concept. The results showed that the 16S V4 region failed to report  
24 accurate SDP diversities due to low taxonomic resolution and changing copy numbers. In contrast,  
25 the single-copy genes recommended by our pipeline were able to successfully quantify *Gilliamella*  
26 SDPs for both mock samples and honeybee guts, with results highly consistent with those of  
27 metagenomics. The pipeline developed in this study is expected to identify single-copy protein  
28 coding genes capable of accurately quantifying diverse bacterial communities at the SDP level.

29  
30 **IMPORTANCE** Microbial communities can be distinguished by discrete genetic and ecological  
31 characteristics. These sequence-discrete populations are foundational for investigating the  
32 composition and functional structures of microbial communities at high resolution. In this study, we  
33 screened for reliable single-copy protein-coding marker genes to identify sequence-discrete  
34 populations through our pipeline. Using marker gene amplicon sequencing, we could accurately and  
35 efficiently delineate the population diversity in microbial communities. These results suggest that  
36 single copy protein-coding genes can be an accurate, quantitative and economical alternative for  
37 characterizing population diversity. Moreover, the feasibility of a gene as marker for any bacterial  
38 population identification can be quickly evaluated by the pipeline proposed here.

39  
40 **KEYWORDS** microbiota, SDP, quantification, 16S, metagenomics, *Gilliamella*

## 41 42 INTRODUCTION

43 Accurate identification of distinct functional units in natural bacterial communities is crucial in  
44 understanding their ecological roles, interactions within the network, as well as the fine-scale  
45 composition and dynamic changes within the whole community. As a rule of thumb, a bacterial  
46 phylotype is often defined by grouping strains that share a sequence identify greater than 97% for a

47 selected fragment of the small subunit (16S) rRNA gene [1]. However, increasing evidence has  
48 indicated that a bacterial phylotype may contain multiple finer lineages, each showing distinct  
49 biological traits. For example, closely related enterotoxigenic *Escherichia coli* (ETEC) isolates  
50 form discrete lineages with consistently definable variations in virulence profiles [2]. Such intra-  
51 phylotype lineages could be delineated based on divergence in genomic sequences and phylogenetic  
52 inferences. These finer subdivisions of phylotypes are called sequence-discrete populations (SDPs),  
53 which typified by genetic and genealogical discontinuity from the rest of the community, and are  
54 delineated by overall sequence divergence at the whole-genome level [3-5]. A broad comparison of  
55 90,000 bacterial genomic sequences, with a close examination of pairwise genomic similarities in  
56 natural bacterial communities, has proved the pervasive discontinuity in genetic similarity below  
57 and above SDPs [3]. Bacteria in the same SDP normally show less than ca. 5% variation in whole-  
58 genome sequences. This genetic divergence is much less than those among strains of the same  
59 phylotype (ca. 30%) [6]. With respect to habitats, specific SDPs are likely ubiquitous in various  
60 environments, such as human and animal guts [5, 7, 8], freshwater [9], ocean [10] and soil [11].  
61 Therefore, SDPs are probably better than phylotypes, as taxonomic units that represent functional  
62 entities in bacterial communities, which are likely shaped by ecological pressure and evolutionary  
63 selection. As such, SDPs are important units of microbial diversity and should be considered as  
64 baseline information for investing crucial questions, such as how do bacterial populations interact  
65 and evolve within communities [4].

66 Despite the essential nature of accurate SDP identification, a rapid and accurate method that can  
67 trace SDP boundaries is still lacking, especially with regards to the selection of proper markers for  
68 evaluating sequence divergence. It is obvious that genetic divergence among bacterial strains is  
69 dependent on which genes are compared. We now understand that the commonly used 16S gene  
70 cannot generally provide sufficient resolution to characterize SDP diversity [12, 13]. For example,  
71 in cases where the SDPs show a ~5-10% genome-wide divergence, they varied mostly merely < 0.1%  
72 in the 16S sequences [14]. Moreover, the copy number of the 16S gene may vary significantly  
73 among phylotypes or even among strains of the same phylotype, making quantitative  
74 characterization of bacterial community a challenging, if not impossible, task [15, 16]. The 16S was  
75 selected for phylotype delineation years ago because it has conserved primer sites that flank  
76 relatively variable regions that made it easy to sequence with Sanger technology. Currently, much  
77 effort has been put into developing genes or gene segments that can be easily sequenced, and that  
78 vary enough to serve as practical proxies for SDP delineation [17-19]. However, a systematic  
79 evaluation of the validity and performance of such genes in SDP delineation, which includes the  
80 rapidly increasing but heterogeneously sampled database, has not been carried out.

81 Fortunately, recent developments in microbial genomics show a promising solution to  
82 complement the coverage of bacterial genomes. The number of sequenced genomes of various  
83 bacterial lineages has been growing rapidly. For example, the Genomes OnLine Database (GOLD)  
84 now contains 437,099 bacterial genomes, the majority of which (397,945) are uncultured,  
85 representing host-associated, environmental and engineered ecosystems [20]. The ever-growing  
86 bacterial genome dataset offers a great opportunity to screen phylogenetically informative genes  
87 that show good performance in taxonomic delineation, including those capable of quantitatively  
88 characterizing bacterial communities at the SDP level [21, 22]. For instance, Wu and colleagues  
89 identified 114 PhyEco universal markers for all bacteria [23]. From these universal markers, 15  
90 single-copy protein-coding genes were successfully applied in estimating species abundances using  
91 shotgun metagenomic data [24]. On the other hand, growing numbers of genomes and  
92 metagenomes produced for particular bacterial communities or taxonomic groups allow for

93 comprehensive characterization of SDP diversity within focal environments and bacterial groups.  
94 Taking social bee gut microbiota as an example, diverse strains derived from major honeybee hosts  
95 have been isolated and deep-sequenced [25], including well-covered SDPs of nearly all core gut  
96 bacterial phylotypes [5, 26, 27]. Thus, the relatively complete genome dataset provides a genome-  
97 wide-based gold standard for defining SDPs for the honeybee core bacteria.

98 In the present study, we developed a pipeline to screen potential marker genes capable of  
99 accurate identification and quantification of SDP diversity. We used the core bacterial phylotype  
100 *Gilliamella* derived from the eastern honeybee *Apis cerana* as a proof of concept, and delineated  
101 *Gilliamella* SDPs based on a set of comprehensive genome sequences. We further screened 15  
102 single-copy protein-coding genes, which are present in all bacteria, to identify candidate marker  
103 genes capable of differentiating the defined *Gilliamella* SDPs. Important characteristics such as the  
104 level of sequence divergence, phylogenetic robustness, and the presence of conservative primer  
105 regions, are considered in marker gene screening. Finally, we applied the candidate markers in  
106 amplicon sequencing of both bacterial mock samples and real honeybee guts to verify their  
107 efficiency in SDP profiling (Fig. 1). The markers we identified could accurately, consistently and  
108 quantitatively capture SDP diversity.

109

## 110 RESULTS

111 **A comprehensive genome reference database for honeybee gut bacteria.** A comprehensive  
112 genome reference database was constructed for honeybee gut bacteria (Table S1). A total of 242  
113 genomes were included, covering 103 isolates from *A. cerana* and 139 from *A. mellifera*. SDPs  
114 were identified for the core gut bacterial phylotypes using these reference genomes. SDPs differed  
115 between honeybee species, which is consistent with previous studies [27, 28]. Within *A. cerana*  
116 phylotypes, 5 SDPs were identified for *Gilliamella* (Gillia, n=65), 2 for *Bifidobacterium* (Bifido,  
117 n=9), 1 for *Lactobacillus* Firm5 (Firm5, n=6), 1 for *Apibacter* (Apib, n=16) and 2 for *Snodgrassella*  
118 (Snod, n=7). Within *A. mellifera* phylotypes, 6 SDPs were identified for Gillia (n=65), 9 for Bifido  
119 (n=19), 2 for *Lactobacillus* Firm4 (Firm4, n=2), 6 for Firm5 (n=18) and 2 for Snod (n=35) (Table  
120 S1). These SDPs delineated by genomes were used as references for subsequent taxonomic  
121 assignments for the 16S, marker gene, or metagenome-based SDP identifications.

122



123  
124  
125  
126  
127  
128  
129  
130  
131

**FIG 1** Screening marker genes suitable for SDP discrimination and quantification. (A) SDPs are identified for gut bacterial phylotypes based on phylogenetic relationships and genome-wide pairwise average nucleotide identities (gANI). (B) A candidate marker gene for SDP discrimination is selected from a set of universal and single-copy genes based on sequence variation, phylogenetic relationship and well-conserved regions for primer design. (C) The performance of marker gene amplicon sequencing (MGAS) on SDP identification and quantification is validated and compared as characterized using the mock samples and gut gut communities.

132 **Single-copy marker genes showed higher sequence variations at the SDP level than the**  
133 **16S gene.** Sufficient sequence variation is crucial for high resolution discrimination of bacterial  
134 SDPs. Here we compared the average Shannon entropy (ASE) between the whole-16S and the 15  
135 single-copy marker genes. Our results clearly showed that the marker genes had much higher ASEs  
136 at both phylotype and SDP levels compared to those of the 16S (Fig. 2A). The regional difference  
137 in the variation levels between 16S and selected marker genes was also compared along the full  
138 gene length. A slide-window (20 bp) ASE analysis showed that although several spikes of variable  
139 regions were identified along the 16S gene, with the highest variable region corresponded to part of  
140 the classic V3 region, its regional ASEs were generally lower compared to marker genes, e.g., *NusA*,  
141 *PTH* and *frr* (Fig. 2B; Fig. S1).

142 Because phylogenetic placement of the query sequence is a critical step in our SDP  
143 identification method, each marker gene will need to first produce a “correct” phylogeny for the  
144 phylotype in question. Therefore, we further examined whether each of the 15 marker genes could  
145 produce the same SDP phylogeny as inferred from whole-genome sequences of *Gilliamella*. Here,  
146 the tree based on all 65 *A. cerana Gilliamella* genomes was used as the gold standard. The results  
147 showed that all 15 marker genes but *rnhB* reconstructed the SDP phylogeny, with all strains  
148 assigned to corresponding SDPs (Fig. S2). On the *rnhB* gene tree, two *Gilliamella* genomes were

149 misplaced from SDP Acer\_Gillia\_4 to Acer\_Gillia\_2, which was likely due to a higher sequence  
 150 similarity between these two SDPs at a value of  $90.93\% \pm 0.18$  SD comparing to that between other  
 151 SDPs ( $79.98\% \pm 1.89$  SD). Therefore, *rnhB* was subsequently excluded from further screening.

152 For the 14 remaining marker genes, we further explored for regions that were suitable for  
 153 amplicon sequencing, based on the presence of conserved primer regions flanking the hyper-  
 154 variable region. The *RimM* gene lacked hyper variable regions across the full gene length (Fig. S1),  
 155 while some other genes (*murB*, *RecR*, *miaA*, *RbfA*, *RibF*, *RuvA*, *RsfS* and *YebY*) did not demonstrate  
 156 promising conserved regions for primer design. These genes were then excluded from the candidate  
 157 gene pool. The 5 remaining candidates (*frr*, *NusA*, *PTH*, *truB* and *smpB*) all had a hyper-variable  
 158 region of ~200-550 bp that was flanked by conservative primer regions. Among them, *frr*, *NusA*  
 159 and *PTH* produced an amplicon of ~200 bp (Fig. 2B), which could be thoroughly sequenced with  
 160 most current shotgun sequencing methods (e.g., PE100 or PE150). These 3 genes were then chosen  
 161 for the final test for their performance in SDP discrimination in both identity and quantity, using  
 162 *Gilliamella* mock samples and real honeybee guts.

163



164  
 165 **FIG 2** Marker genes are highly variable among SDPs. (A) Average Shannon entropy of the 15 marker genes and  
 166 the 16S gene at both phylotype and SDP levels of honey bee gut bacteria. Numbers in brackets for each of the  
 167 SDP groups indicate the number of strains examined for that specific group. (B) The Shannon entropy across 16S  
 168 and candidate marker genes of all *A. cerana Gilliamella*. The Shannon entropy value is subsequently averaged by  
 169 a 20-bp slide-window at a 5-bp step. Gray shadows depict conserved regions optimal for primer-binding sites and  
 170 blue shadows are considered as hypervariable regions in this study. Dash lines represent the mean Shannon

171 entropy values cross all sequences. Gray lines depict the classic variable regions of the 16S gene. Apib: *Apibacter*;  
172 Bifido: *Bifidobacterium*; Firm5: *Lactobacillus* Firm5; Gillia: *Gilliamella*; Snod: *Snodgrassella alvi*.

173

174 **Marker gene amplicon sequencing (MGAS) showed high accuracy, sensitivity and**  
175 **repeatability in SDP profiling of mock samples.** Mock samples contained varied proportions of  
176 the representative strain cultures of the 5 *Gilliamella* SDPs. These samples were extracted for DNA  
177 and amplified for the hyper-variable regions of the 3 candidate marker genes (*frr*, *NusA* and *PTH*).  
178 Twenty-four barcoded amplicons were pooled and shotgun sequenced for ca. 1 Gb data (ca. 2.5  
179 million reads). Each mock sample was sequenced three times. An average of 73,462, 86,467 and  
180 113,498 reads per sample was generated for *frr*, *NusA* and *PTH*, respectively.

181 The results of MGAS showed a high level of repeatability across the three replicates, where the  
182 average ICC(C,1) > 0.9, except for *PTH*, which had an ICC(C,1) of 0.752 among samples with  
183 equal proportion of bacterial DNA (Fig. 3A; Fig. S4C). With regards to detection accuracy, MGAS  
184 correctly detected all bacterial members present in 22/24 samples, while two samples (S03 and S04)  
185 showed false positive results, which was probably derived from sample contamination or  
186 sequencing error (Fig. 3B). Because the sensitivity of amplicon sequencing was affected by  
187 sequencing depth, we calculated the minimum read numbers required to detect members at low  
188 abundances, using rarefaction curves (Fig. S5). The results suggested that strains with a relative  
189 abundance of 1% could be detected by a minimum of ca. 1,123, 2,953 and 5,034 reads for *frr*, *NusA*  
190 and *PTH* (equivalent to 0.49, 1.29 and 2.44 Mb data per sample), respectively. Accordingly, lower  
191 abundance would require deeper sequencing. At a relative abundance of 0.02%, approximately  
192 17,778, 18,518 and 22,222 reads (7.75, 8.07 and 10.76 Mb data) were required for *frr*, *NusA* and  
193 *PTH*, respectively (Fig. 3D; Fig. S5). The sequencing depth was generally sufficient for SDP  
194 detection in our study. Among the 216 sequenced samples, only two samples were sequenced with  
195 only 963 (*frr*) and 2,348 (*PTH*) reads, respectively, and failed in identifying corresponding SDP  
196 members at the lowest proportions (1% and 0.1%, respectively) due to insufficient sequencing  
197 depth.

198 In addition to accurately identify *Gilliamella* SDPs, all three marker genes performed well in  
199 quantifying relative abundances for mock samples. The relative abundances revealed by amplicon  
200 reads were highly congruent with corresponding mock proportions in bacterial mock samples, with  
201 the average R<sup>2</sup> values of 0.91, 0.74 and 0.66 for *frr*, *NusA* and *PTH*, respectively ( $p < 2.2e-16$ , Fig.  
202 3C). The DNA mock samples yielded similar results, with the average R<sup>2</sup> values of 0.99, 0.91 and  
203 0.99, for *frr*, *NusA* and *PTH*, respectively (Fig. S4B). Taken together, the MGAS method showed  
204 high levels of accuracy, sensitivity and repeatability in characterizing SDP compositions, in both  
205 taxonomic identity and relative abundance.

206



207  
208  
209  
210  
211  
212  
213  
214  
215  
216  
217  
218  
219  
220

**FIG 3** MGAS accurately identifies *A. cerana Gilliamella* SDPs. (A) Intra-class correlation coefficient (ICC) of relative abundance among the three replicates of MGAS samples. The ICC is calculated using the two-way mixed effects model with consistency (C) as the relationship among replicates, and single (1) result as the unit of measurement, i.e., ICC(C, 1). (B) Relative SDP abundances in mock samples revealed by marker gene sequencing. The results shown in the heatmap are the logarithms of the relative abundances of the five representative strains of the five SDPs of *A. cerana Gilliamella*. Grey box indicates a relative abundance at zero. False positive results are framed in red. (C) Spearman correlation of SDP abundances in *A. cerana Gilliamella* communities revealed by sequencing against mock samples.  $p < 2.2e-16$ . The black line presents the linear regression of the MGAS results against SDP abundances in mock samples. The blue solid and gray dashed lines represent a 1: 1 line and the fitted exponential regression (with 95 % confidence interval shown in gray shade), respectively. (D) Minimum read numbers required for detecting members at low abundances.

221 **MGAS performed equally well as metagenomics in characterizing honeybee gut SDP**  
222 **diversity.** To examine the performance of the MGAS method in characterizing honeybee gut  
223 microbiota, we used *frr* (Fig. 4) and *PTH* (Fig. S6) genes to calculate *Gilliamella* SDP diversities  
224 for the 12 *A. cerana* workers from Sichuan and Taiwan, China. The MGAS was able to assign  
225 strains to the correct SDP at accurate abundance for real gut samples, with results were highly  
226 congruent with those from metagenomic sequencing (with  $R^2 = 0.99$  for *frr* and 0.97 for *PTH*,  $p <$   
227  $2.2e-16$ , Fig. 4B; Fig. S6B). Both results revealed that most individual bees were dominated by two  
228 or three *Gilliamella* SDPs, yet with significant variations in dominant members and compositions  
229 among individuals and across geographical locations (Fig. 4A). *Gillia\_Acer\_2* was the dominant  
230 SDP in most of the sequenced bees, which was found in 11 out of the 12 samples, with 10 bearing  
231 relative abundances of 48.06 - 98.37% (Fig. 4A). Both methods showed congruent results in alpha  
232 diversity ( $p = 0.82$  and 0.79 for MGAS and metagenomics sequencing, respectively, Wilcoxon  
233 rank-sum test, Fig. 4C). At the beta diversity level, the principal coordinate analysis (PCoA) based  
234 on Bray-Curtis dissimilarity revealed that the gut bacterial communities from bees of Sichuan and  
235 Taiwan formed two distinct clusters, which separated along the first axis (Fig. 4D). This result was  
236 again consistent between the MGAS and metagenomic methods (Adonis PERMANOVA,  $R^2 =$

237 0.056,  $p = 0.204$  for MGAS and  $R^2 = 0.096$ ,  $p = 0.134$  for metagenomics). Thus, the performance of  
 238 SDP profiling using MGAS was parallel to the metagenomic gold standard in microbial community  
 239 studies.  
 240



241  
 242  
 243 **FIG 4** MGAS shows high congruence to metagenomic sequencing at SDP-level analysis. (A) Relative  
 244 abundances of *Gilliamella* SDPs revealed by MGAS (*frf*) and metagenomics sequencing of *A. cerana* gut  
 245 communities. (B) Spearman correlation coefficient between MGAS and metagenomics results, with  $R^2 = 0.99$ ,  $p <$   
 246  $2.2e-16$ . The black line presents the linear regression of the MGAS results in SDP abundances against those of  
 247 metagenomics. The blue solid and gray dashed lines represent a 1: 1 line and the fitted exponential regression  
 248 (with 95 % confidence interval shown in gray shade), respectively. (C) Shannon diversity index of SDP  
 249 frequencies for bee guts from two locations calculated by MGAS (left panel) and metagenomic sequencing (right  
 250 panel). The two methods showed no significant difference, with the  $p$ -value of 0.70 and 0.82 in SC and TW,  
 251 respectively, by Wilcoxon rank-sum test. (D) Principal coordinate analysis (PCoA) based on Bray-Curtis  
 252 dissimilarity of SDP compositions of honey bee workers from Sichuan and Taiwan using MGAS (left panel,  
 253 Adonis PERMANOVA,  $R^2 = 0.056$ ,  $p = 0.204$ ) and metagenomic sequencing (right panel, Adonis  
 254 PERMANOVA,  $R^2 = 0.096$ ,  $p = 0.134$ ). Each point represents the value for an individual bee and the color  
 255 represent the location (Sichuan or Taiwan) of each bee. The shaded ellipses represent 95% confidence intervals on  
 256 the ordination. (E) Relative abundances of *Gilliamella* OTUs in the gut microbiota of *A. cerana* assigned by  
 257 clustering at 97% or 99% thresholds for 16S V4 and *frf*. The result shown in the heatmap are the logarithms of the  
 258 relative abundances of the OTUs or five SDPs. Individual bees are marked to right of each row. Grey box  
 259 indicates a relative abundance at zero.  
 260

261 The 16S V4 region was also used to determine the *Gilliamella* SDP compositions for the 6 bee  
 262 gut samples from Sichuan. We applied operational taxonomic unit (OTU) clustering based on  
 263 sequence similarity at 97% and 99% identity thresholds, which are commonly adopted for  
 264 surveying phylotype and intra-phylotype microbial diversities, respectively [12, 29], to assess the  
 265 efficacy of 16S in SDP profiling. 16S amplicon sequencing resulted in 8 and 10 OTUs at 97% and  
 266 99% thresholds, respectively, with a frequency cut off at  $> 100$ . The identified OTU numbers

267 differed from those of the MGAS results at the same sequence similarity thresholds (Fig. 4E).  
268 Alarming, 16S amplicons failed to assign OTUs to the correct SDPs via blast. And the relative  
269 OTU proportions revealed by 16S disagreed with those from MGAS, where the numbers of  
270 dominant OTUs (> 1%) revealed by MGAS were more congruent to those from metagenomics. The  
271 improved performance with the MGAS method in characterizing SDP diversity is likely due to  
272 greater sequence divergence of the marker genes. For instance, the average pairwise inter-SDPs  
273 sequence similarity in the *frr* hyper-variable region was significantly lower ( $90.92\% \pm 3.18$ ,  $n = 65$ )  
274 than that of the 16S rRNA gene V4 region ( $99.95\% \pm 0.65$ ,  $n = 44$ ) (Wilcoxon rank-sum test,  $p <$   
275  $2e-16$ ).

276

## 277 SUMMARY AND DISCUSSION

278 We developed a pipeline to identify reliable marker genes for accurate identification and  
279 quantification of SDPs from bacterial communities. Three important criteria were applied in the  
280 assessment: the extent of sequence divergence, phylogenetic accuracy, and the presence of flanking  
281 conservative primer regions. Single-copy protein-coding genes identified by our pipeline were  
282 applied as marker genes in SDP quantification of honeybee gut microbiota, successfully producing  
283 results consistent with those from metagenomics, which were used as the gold standard. Conversely,  
284 we showed that the widely used 16S contained limited sequence divergence within phylotypes,  
285 failing to provide sufficient resolution in differentiating SDPs. As a result, 16S V4 amplicon  
286 sequencing cannot reflect fine scale bacterial diversity for the community. Consequently, dominant  
287 OTUs delineated by 16S at 97% or 99% thresholds significantly differed from the defined SDPs.  
288 On the other hand, the OTUs of single-copy protein-coding genes screened out by our pipeline were  
289 successfully assigned to the correct SDPs, and the numbers of dominant OTUs showed more  
290 congruent results to those from metagenomics.

291 Compared with whole-genome shotgun sequencing, amplicon sequencing of single-copy  
292 protein-coding genes provides an alternative solution to characterize SDP diversity in an accurate,  
293 quantitative and economical way. We address that not every single copy protein-coding gene is  
294 efficacious in SDP quantification. The candidate gene must meet all three criteria integrated in our  
295 pipeline to be a good marker gene. For a phylotype that is well represented by genomes of various  
296 lineages, all single-copy genes, including protein-coding genes, can be evaluated by our pipeline. In  
297 this case, we expect dozens to hundreds of proper marker genes to be filtered out. On the other hand,  
298 a small set of core single-copy protein-copy genes that are determined to be universally present  
299 among known bacteria, such as the 15 marker genes tested in this study, will likely provide  
300 candidate genes suitable for accurate characterization of SDP diversity for less known bacterial taxa.

301 Accurate identification of the SDP composition will also facilitate the prediction of the  
302 functional capacity of microbial communities. Functional attributes of a given bacterial lineage are  
303 strongly correlated to its phylogenetic position [30]. Therefore, various approaches, e.g., PICRUTs  
304 [31], have been developed to predict potential functions of a given microbial community based on  
305 phylogenetic profiles of bacterial members. However, 16S sequences are employed in most current  
306 programs for phylogenetic reconstruction. As demonstrated in this study, single-copy protein-  
307 coding genes identified by our pipeline show better fidelity in revealing phylogenetic relationships  
308 for the focal phylotype. Therefore, we anticipate that function prediction for microbial communities  
309 will be further improved by integrating single-copy protein-coding genes and the screening pipeline  
310 described here.

311

## 312 MATERIALS AND METHODS

313 **Genome references of core gut bacteria of honeybees.** A total of 242 bacterial genomes  
314 associated with *A. mellifera* and *A. cerana* were downloaded from the NCBI genome database  
315 (Table S1). These 242 genomes were used as the reference database of honeybee gut bacteria,  
316 which comprised the 6 major phylotypes: *Apibacter* (n=16), *Bifidobacterium* (n=28), *Lactobacillus*  
317 Firm4 (n=2), *Lactobacillus* Firm5 (n=24), *Gilliamella* (n=130) and *Snodgrassella* (n=42).

318 **SDP delineation for honeybee core phylotypes.** Protein-coding genes of all sequenced  
319 genomes were annotated using Prokka (<https://github.com/tseemann/prokka>) [32]. Core genes,  
320 which were defined as being shared by > 99% strains of a given phylotype, were identified using  
321 Roary (version 3.13.0) [33] with the parameter -blastp 75. Multiple sequence alignments were  
322 carried out using MAFFT (version v7.467, [https://github.com/The-Bioinformatics-](https://github.com/The-Bioinformatics-Group/Albiorix/wiki/mafft)  
323 [Group/Albiorix/wiki/mafft](https://github.com/The-Bioinformatics-Group/Albiorix/wiki/mafft)) [34]. Phylogenetic trees were constructed using core single-copy genes  
324 of each phylotype by RAxML (version 8.2.12, -x 12345 -N 1000 -p 12345 -f a -m GTRGAMMA)  
325 [35]. Phylogenies were visualized in R (version 3.6.0) using the package ggtree\_v2.4.1 [36] or  
326 iTOL (version 6.1.1) [37]. Pairwise genome-wide average nucleotide identity (gANI) values were  
327 calculated using pyani (version 0.2.10; <https://github.com/widdowquinn/pyani>) [38]. A clade with a  
328 gANI  $\geq$  95% from its closest clade was defined as an SDP.

329 **Screening for candidate marker genes capable of discriminating *Gilliamella* SDPs.** The  
330 fifteen universal single-copy maker genes (*frr*, *NusA*, *PTH*, *RbfA*, *RecR*, *rnhB*, *RibF*, *RimM*, *RsfS*,  
331 *RuvA*, *smpB*, *truB*, *miaA*, *murB* and *YebY*, listed in Table S2) [24] were evaluated as candidate  
332 genes. The sequences of candidate marker genes were retrieved by MIDAS (version 1.3.2) [24],  
333 whereas the 16S genes were retrieved from the reference genomes using an in-house script. The  
334 average Shannon entropy (ASE) of the full gene length was used to assess sequence variation  
335 between strains of inter- and intra-SDPs for all phylotypes, where the Shannon entropy for each  
336 nucleotide site across genomes in comparison was calculated using oligotyping (version 2.1) [39].

337 The phylotype *Gilliamella*, which contains the most genomes available for this study, was used  
338 as a proof of concept to examine the efficacy of marker genes in SDP differentiation. For each  
339 SDPs in phylotype *Gilliamella*, the Shannon entropy values were subsequently averaged for each  
340 20-bp slide-window with a 5-bp step to evaluate the regional genetic divergence along the full  
341 length of the marker genes. Pairwise sequence similarities were determined by Clustal Omega [40].

342 From the candidate genes, potential marker genes that may efficiently distinguish all known  
343 SDPs of the *Gilliamella* phylotype were screened. The following criteria were followed: 1) the  
344 marker genes should contain conservative regions flanking the hyper-variable region for designing  
345 primers enabling recovery target phylotype; 2) the amplicon length is between ~150-550 bps; 3) the  
346 amplified region is sufficiently variable to allow the discrimination of SDPs; and 4) the primers are  
347 specific to the focal phylotype to avoid off-target amplifications. The aforementioned 15 marker  
348 genes were subject to these criteria, and 5 of them (*frr*, *NusA*, *PTH*, *truB* and *smpB*) were selected as  
349 potential markers for identifying SDPs of *A. cerana* *Gilliamella*. Among these, three genes (*frr*,  
350 *NusA* and *PTH*) were subjected to further testing as a proof of concept, because their amplicon  
351 lengths were 206, 206 and 230 bp, respectively, which were ideal for current shotgun sequencing  
352 platforms. To increase the throughput and cost efficiency, 24 amplicons were pooled for one  
353 sequencing run. The 5' end of both forward and reverse primers were tagged with 6-bp unique  
354 barcode sequences (see Table S3) to distinguish positive and negative DNA strains, and to  
355 differentiate samples.

356 **Bacterial mock samples.** One representative strain from each of the five *Gilliamella* SDPs  
357 associated with *A. cerana* was cultured at 35°C and 5% CO<sub>2</sub> for 48 h, on heart infusion agar (HIA)

358 medium containing 5% sheep's blood [41]. To screen potential contaminations, the full-length 16S  
359 gene was amplified for each bacterial culture using universal primers 27F and 1492R [41] and was  
360 subject to Sanger sequencing. 16S sequences were checked against those of the reference strains for  
361 identification, before strains were mixed for mock samples. Each *Gilliamella* culture was adjusted  
362 to OD<sub>600</sub> = 0.5. Twenty-four mock SDP communities were prepared by mixing up 2-5 of the  
363 representative strains at varied proportions. The compositions of the mock samples were set as:  
364 equal proportion of each of the five strains, equal proportion of four strains with the absence of one  
365 strain at a time, equal proportion of three strains with the absence of two randomly selected strains,  
366 and a series of varied compositions with relative abundances ranging from ca. 0.02% to 50%. DNA  
367 of the bacterial mixtures were extracted using a CTAB-based DNA extraction protocol followed by  
368 recovery in 10 mM Tris-EDTA buffer (1×TE, pH 7.4) and quantified using the Qubit® DNA Assay  
369 Kit on a Qubit® 3.0 Fluorometer (Life Technologies, CA, USA). Alternatively, genomic DNA of  
370 each of the five representative strain cultures was extracted separately and the mixed at varied  
371 compositions and proportions (see Table S4).

372 **SDP identification and quantification for mock samples using amplicon sequencing of the**  
373 **three marker genes.** PCR amplification was performed for *frr* (*frr*-F 5'  
374 GCTGAAGATGCAAGAAC and *frr*-R 5' GCATCACGACGAATATT), *NusA* (*NusA*-F 5'  
375 CTTGAAATTGAAGAACT and *NusA*-R 5' GTACCTTGTTTCAGCTAA), and *PTH* (*PTH*-F 5'  
376 AAAGTTATTGTAGG and *PTH*-R 5' CCACTTAAATTCATAAA) for each mock sample with  
377 three replicates. Triplicate 50-μl reactions were carried out with 25 μl of 2 × Phanta Max Master  
378 Mix (Vazyme Biotech, Nanjing, China), 2 μl (each) of 10 μM primer, 19 μl of ddH<sub>2</sub>O, and 2 μl of  
379 template DNA. The thermocycling profile consisted of an initial 3-min denaturation at 95 °C, 35  
380 cycles of 15 s at 95 °C, 15 s at 52 °C for *NusA* and *frr* or at 42 °C for *PTH*, and 20 s at 72 °C and a  
381 final 10-min extension step at 72 °C. After being visualized on 2% agarose gels, DNA was purified  
382 using a gel extraction kit (Qiagen, Germany) and quantified using the Qubit® DNA Assay Kit on a  
383 Qubit® 3.0 Fluorometer. Barcoded amplicons of up to 24 mock samples were pooled together and  
384 subject to Illumina sequencing using a NovaSeq 6000 platform (PCR-free library, 150 PE) at  
385 Novogene (Beijing, China). Approximately 1 Gb of raw data were obtained from each pooled  
386 library (Table S5).

387 The program fastq-multx (version 1.3.1. <https://github.com/brwnj/fastq-multx>) was employed  
388 to demultiplex sequencing reads based on barcode sequences. The 6-bp barcodes in reverse  
389 sequences were trimmed using Seqtk (<https://github.com/lh3/seqtk>). The demultiplexed paired-end  
390 reads were then analyzed in QIIME2 (version 2020.2. <https://qiime2.org>) [42]. A plugin DATA2  
391 [43] was used to denoise reads and to group sequences into amplicon sequence variants (ASVs).  
392 Individual ASVs were then taxonomically classified using blast (classify-consensus-blast) at a 97%  
393 identity threshold (Fig. S3) against the 3 marker genes (*frr*, *NusA* and *PTH*) derived from the  
394 customized bee gut bacterial dataset. The relative abundance of each SDP (RA<sub>SDP</sub>) was calculated  
395 as:  $RA_{SDP} = (NR_{SDP}) / (NR_{Gillia}) * 100$ , where NR<sub>SDP</sub> represents the number of reads mapped to the  
396 focal SDP and NR<sub>Gillia</sub> represents the number of reads mapped to all *Gilliamella* SDPs. These  
397 estimated abundances were then compared to those of the mock samples. The performance of SDP  
398 profiling of the 3 marker genes was evaluated on the basis of accuracy, sensitivity and repeatability.  
399 Intraclass correlation coefficient (ICC) with a two way random/mixed (ICC(C,1) ) model was used  
400 to assess the repeatability of this method using SPSS (version 20.1) [44].

401 Rarefaction curves were plotted using identified SDP numbers against read numbers, which  
402 were used to infer the minimum read number required to detect strains at varied proportions. For  
403 each sample, ASVs with a depth <100 were filtered out. Rarefaction was performed using QIIME2

404 with the plugin alpha-rarefaction and a sampling depth of 40,000 reads per sample and default  
405 parameters. Minimum read numbers for identifying SDPs with relative abundances of 0.02%, 1%  
406 and 20% were chosen manually.

407 **SDP identification and quantification for *A. cerana* gut microbiota using 16S, marker**  
408 **genes, and metagenome sequencing.** Adult worker bees collected in Sichuan were used to  
409 quantify *Gilliamella* SDP diversity using three different methods (16S V4 region amplicon  
410 sequencing, MGAS and metagenomic sequencing). Bees were first cooled at 4 °C for 10 min. Then  
411 the entire guts were dissected from the abdomen using sterile forceps and DNA was extracted using  
412 a CTAB bead-beating protocol described previously [45].

413 Firstly, the 16S V4 region was amplified for six bee guts from Sichuan and sequenced using an  
414 Illumina Hiseq X Ten platform (250-300 bp insert size, 250 PE) at BGI-Shenzhen (Shenzhen,  
415 China). Raw reads obtained for each sample were summarized in Table S6. Data quality control  
416 was performed using fastp (version 0.13.1, -q 20 -u 10 -w 16) [46]. The demultiplexed sequences  
417 were denoised and grouped into ASVs using an open reference method VSEARCH [47] embedded  
418 in QIIME 2. The taxonomic identification for ASVs was subsequently performed using the naive-  
419 Bayesian classifier trained on the BGM-Db, a curated 16S reference database for the classification  
420 of honeybee and bumblebee gut bacteria [48]. A feature table and ASVs consisting of filtered 16S  
421 reads pertaining to *Gilliamella* was constructed. OTU clustering was performed at both 97% and 99%  
422 identity thresholds, respectively, using VSEARCH with cluster-features-de-novo method.  
423 Additionally, low-abundant OTUs comprising of <100 reads were removed. Taxonomic  
424 assignments for OTUs were performed using blast against the BGM-Db with SDP-level taxonomy.  
425 OTU composition heatmaps were generated based on relative abundances and visualized in R.

426 Secondly, for each sample, the marker genes *frr* and *PTH*, which demonstrated the best and  
427 worst performances in accuracy and sensitivity, respectively, among the 3 marker genes, were  
428 applied following the same pipeline used in the mock samples. ASVs of the six sample from  
429 Sichuan were clustered into OTUs and filtered following the abovementioned 16S V4 pipeline.  
430 Taxonomic assignments for OTUs were performed by blast against *frr* sequences derived from the  
431 customized bee gut bacterial genome sequence database.

432 Finally, metagenome sequencing of four bee (B0108, B0120, B0154 and B0174) guts was  
433 performed using an Illumina Hiseq X Ten platform (300-400 bp insert size, 150 PE) at BGI-  
434 Shenzhen. Additional metagenomes of eight worker bee guts (BioProject PRJNA705951) were  
435 download from NCBI (Table S6). The metagenome sequencing was used as the gold standard for  
436 *Gilliamella* diversity distributed in the honeybee guts. Shotgun reads mapped to the *A. cerana*  
437 genome (GCF\_001442555.1) using BWA aln (version 0.7.16a-r1181, -n 1) [49] were identified as  
438 host reads and subsequently excluded. We used the 'run\_midias.py species' script in MIDAS with  
439 default parameters to estimate the relative abundances of SDPs for each sample. Finally, the results  
440 from MGAS were compared to those from metagenome sequencing to assess the performance of  
441 the marker genes.

442 **Data availability.** Raw data from MGAS, 16S V4 amplicon and metagenomic sequencing have  
443 been submitted to NCBI under BioProject PRJNA772085.

444

#### 445 **SUPPLEMENTAL MATERIAL**

446 **FIG S1** The Shannon entropy across the remain marker genes of all *A. cerana Gilliamella*. The  
447 Shannon entropy value is subsequently averaged by a 20-bp slide-window at a 5-bp step. Dash lines  
448 represent the mean Shannon entropy values cross all sequences.

449 **FIG S2** All but *mhB* of the 15 marker genes produce five SDPs for *A. cerana Gilliamella*  
450 phylotype in concert with the whole-genome result.

451 **FIG S3** Histograms of average nucleotide identity values of the 3 marker genes from comparisons  
452 between strains belonging to the same SDPs (green) or different SDPs (red). Vertical black line  
453 indicates the threshold for bacterial SDPs taxonomy for the present method.

454 **FIG S4** MGAS accurately identifies the *A. cerana Gilliamella* SDPs in DNA mock samples. (A)  
455 Relative SDP abundances in mock samples revealed by MGAS. The results shown in the heatmap  
456 are the logarithms of the relative abundances percentage of the five representative strains of the five  
457 SDPs of *A. cerana Gilliamella*. Grey box indicates a relative abundance at zero. (B) Spearman  
458 correlation of SDP abundances in *A. cerana Gilliamella* communities revealed by sequencing against  
459 mock samples,  $p < 2.2e-16$ . The black line presents the linear regression of the MGAS results  
460 against SDP abundances in mock samples. The blue solid and gray dashed lines represent a 1: 1 line  
461 and the fitted exponential regression (with 95 % confidence interval shown in gray shade),  
462 respectively. (C) Repeatability of relative abundance between replicates of DNA mock samples.  $n =$   
463 6, ICC(C,1) is 0.936, 0.974 and 0.752 for *frr*, *NusA* and *PTH* genes, respectively.

464 **FIG S5** Rarefaction curves of detected bacterial SDPs in bacterial mock samples reach the  
465 saturation stage with increasing read numbers.

466 **FIG S6** Amplicon sequencing with the *PTH* gene showed high congruence to metagenomic  
467 sequencing at SDP-level analyses. (A) Relative abundances of *Gilliamella* SDPs revealed by  
468 MGAS (*PTH* gene) and metagenomics sequencing of *A. cerana* gut communities. (B) Spearman  
469 correlation coefficient between MGAS and metagenomics results, with  $R^2 = 0.97$ ,  $p < 2.2e-16$ . The  
470 black line presents the linear regression of the MGAS results in SDP abundances against those of  
471 metagenomics. The blue solid and gray dashed lines represent a 1: 1 line and the fitted exponential  
472 regression (with 95 % confidence interval shown in gray shade), respectively.

473 **TABLE S1** Information of the reference genomes.

474 **TABLE S2** Information of the marker genes.

475 **TABLE S3** List of barcode sequences.

476 **TABLE S4** Mixing ratio of mock samples.

477 **TABLE S5** Statistics of data outputs.

478 **TABLE S6** Summary of read processing and data obtained from marker gene, 16S V4 amplicon  
479 and metagenomic sequencing of honey bee guts.

480

## 481 **ACKNOWLEDGEMENTS**

482 This work was supported by the Program of Ministry of Science and Technology of China  
483 (2018FY100403), National Natural Science Foundation of China (No. 31772493) and National  
484 Natural Science Foundation of China (No. 32000346).

485 The authors declare no competing financial interests.

486 Xin Z. and Xue Z. designed, organized and coordinated the study. C.Y. conducted the screening  
487 pipeline development, marker gene and 16S V4 amplicon sequencing analysis. Q.S. retrieved the  
488 sequences of the 16S and single-copy protein-coding genes, and conducted reference-based  
489 metagenome mapping. M.T. assisted in sequence variation analysis. S.L. conducted sample  
490 collection and SDP identification. Xin Z., Xue Z., C.Y. and Hao Z. wrote the first drafts and all  
491 authors contributed to and proofed the manuscript.

492

## 493 **REFERENCES**

- 494 1. Moreira D, López-García P. 2011. Phylotype, p 1254-1254. *In* Gargaud M, Amils R,  
495 Quintanilla JC, Cleaves HJ, Irvine WM, Pinti DL, Viso M. Berlin, Heidelberg, Encyclopedia of  
496 Astrobiology. Springer Berlin Heidelberg.
- 497 2. von Mentzer A, Connor TR, Wieler LH, Semmler T, Iguchi A, Thomson NR, Rasko DA, Joffre  
498 E, Corander J, Pickard D, Wiklund G, Svennerholm A-M, Sjöling Å, Dougan G. 2014.  
499 Identification of enterotoxigenic *Escherichia coli* (ETEC) clades with long-term global  
500 distribution. *Nat Genet* 46:1321-1326.
- 501 3. Jain C, Rodriguez RL, Phillippy AM, Konstantinidis KT, Aluru S. 2018. High throughput ANI  
502 analysis of 90K prokaryotic genomes reveals clear species boundaries. *Nat Commun* 9(1):5114.
- 503 4. Caro-Quintero A, Konstantinidis KT. 2012. Bacterial species may exist, metagenomics reveal.  
504 *Environ Microbiol* 14:347-355.
- 505 5. Ellegaard KM, Engel P. 2019. Genomic diversity landscape of the honey bee gut microbiota.  
506 *Nat Commun* 10:446.
- 507 6. Konstantinidis KT, Tiedje JM. 2005. Genomic insights that advance the species definition for  
508 prokaryotes. *Proc Natl Acad Sci U S A* 102:2567-2572.
- 509 7. Fehlner-Peach H, Magnabosco C, Raghavan V, Scher JU, Tett A, Cox LM, Gottsegen C,  
510 Watters A, Wiltshire-Gordon JD, Segata N, Bonneau R, Littman DR. 2019. Distinct  
511 polysaccharide utilization profiles of human intestinal *Prevotella copri* isolates. *Cell Host*  
512 *Microbe* 26:680-690 e685.
- 513 8. Tett A, Huang KD, Asnicar F, Fehlner-Peach H, Pasolli E, Karcher N, Armanini F, Manghi P,  
514 Bonham K, Zolfo M, Filippis FD, Magnabosco C, Bonneau R, Lusingu J, Amuasi J, Reinhard  
515 K, Rattei T, Boulund F, Engstrand L, Zink A, Collado MC, Littman DR, Eibach D, Ercolini D,  
516 Rota-Stabelli O, Huttenhower C, Maixner F, and Segata N. 2019. The *Prevotella copri*  
517 complex comprises four distinct clades underrepresented in westernized populations. *Cell Host*  
518 *Microbe* 26:666-679 e667.
- 519 9. Oh S, Caro-Quintero A, Tsementzi D, DeLeon-Rodriguez N, Luo C, Poretsky R,  
520 Konstantinidis KT. 2011. Metagenomic insights into the evolution, function, and complexity of  
521 the planktonic microbial community of Lake Lanier, a temperate freshwater ecosystem. *Appl*  
522 *Environ Microbiol* 77:6000-6011.
- 523 10. Konstantinidis KT, DeLong EF. 2008. Genomic patterns of recombination, clonal divergence  
524 and environment in marine microbial populations. *ISME J* 2:1052-1065.
- 525 11. Olm MR, Crits-Christoph A, Diamond S, Lavy A, Matheus Carnevali PB, Banfield JF. 2020.  
526 Consistent metagenome-derived metrics verify and delineate bacterial species boundaries.  
527 *mSystems* 5:e00731-19.
- 528 12. Kim M, Oh HS, Park SC, Chun J. 2014. Towards a taxonomic coherence between average  
529 nucleotide identity and 16S rRNA gene sequence similarity for species demarcation of  
530 prokaryotes. *Int J Syst Evol Microbiol* 64:346-351.
- 531 13. Yarza P, Yilmaz P, Pruesse E, Glockner FO, Ludwig W, Schleifer KH, Whitman WB, Euzéby  
532 J, Amann R, Rossello-Mora R. 2014. Uniting the classification of cultured and uncultured  
533 bacteria and archaea using 16S rRNA gene sequences. *Nat Rev Microbiol* 12:635-645.
- 534 14. DeLong EF, Preston CM, Mincer T, Rich V, Hallam SJ, Frigaard N-U, Martinez A, Sullivan  
535 MB, Edwards R, Brito BR, Chisholm SW, Karl DM. 2006. Community genomics among  
536 stratified microbial assemblages in the ocean's interior. *Science* 311:486-503.
- 537 15. Sun DL, Jiang X, Wu QL, Zhou NY. 2013. Intragenomic heterogeneity of 16S rRNA genes  
538 causes overestimation of prokaryotic diversity. *Appl Environ Microbiol* 79:5962-5969.

- 539 16. Mende DR, Sunagawa S, Zeller G, Bork P. 2013. Accurate and universal delineation of  
540 prokaryotic species. *Nat Methods* 10:881-884.
- 541 17. Powell E, Ratnayeke N, Moran NA. 2016. Strain diversity and host specificity in a specialized  
542 gut symbiont of honeybees and bumblebees. *Mol Ecol* 25:4461-4471.
- 543 18. Raymann K, Bobay LM, Moran NA. 2018. Antibiotics reduce genetic diversity of core species  
544 in the honeybee gut microbiome. *Mol Ecol* 27:2057-2066.
- 545 19. Bobay LM, Wissel EF, Raymann K. 2020. Strain structure and dynamics revealed by targeted  
546 deep sequencing of the honey bee gut microbiome. *mSphere* 5:e00694-20.
- 547 20. Mukherjee S, Stamatis D, Bertsch J, Ovchinnikova G, Sundaramurthi JC, Lee J, Kandimalla M,  
548 Chen IA, Kyrpides NC, Reddy TBK. 2021. Genomes OnLine Database (GOLD) v.8: overview  
549 and updates. *Nucleic Acids Res* 49:D723-D733.
- 550 21. Baldaufnl SL, Baldaufnl AJ, Wenk-Siefert I, Doolittle WF. 2000. A kingdom-level phylogeny  
551 of Eukaryotes based on combined protein data. *Science* 290:972-977.
- 552 22. Konstantinidis KT, Tiedje JM. 2005. Towards a genome-based taxonomy for prokaryotes. *J*  
553 *Bacteriol* 187:6258-6264.
- 554 23. Wu D, Jospin G, Eisen JA. 2013. Systematic identification of gene families for use as  
555 "markers" for phylogenetic and phylogeny-driven ecological studies of bacteria and archaea  
556 and their major subgroups. *PLoS One* 8:e77033.
- 557 24. Nayfach S, Rodriguez-Mueller B, Garud N, Pollard KS. 2016. An integrated metagenomics  
558 pipeline for strain profiling reveals novel patterns of bacterial transmission and biogeography.  
559 *Genome Res* 26:1612-1625.
- 560 25. Zheng H, Steele MI, Leonard SP, Motta EVS, Moran NA. 2018. Honey bees as models for gut  
561 microbiota research. *Lab Anim (NY)* 47:317-325.
- 562 26. Voulgari-Kokota A, McFrederick QS, Steffan-Dewenter I, Keller A. 2019. Drivers, diversity,  
563 and functions of the solitary-bee microbiota. *Trends Microbiol* 27:1034-1044.
- 564 27. Kwong WK, Medina LA, Koch H, Sing KW, Soh EJY, Ascher JS, Jaffé R, Moran NA. 2017.  
565 Dynamic microbiome evolution in social bees. *Science Advances* 3:e1600513.
- 566 28. Ellegaard KM, Suenami S, Miyazaki R, Engel P. 2020. Vast differences in strain-level  
567 diversity in the gut microbiota of two closely related honey bee species. *Curr Biol* 30:2520-  
568 2531 e2527.
- 569 29. Edgar RC. 2018. Updating the 97% identity threshold for 16S ribosomal RNA OTUs.  
570 *Bioinformatics* 34:2371-2375.
- 571 30. Martiny AC, Treseder K, Pusch G. 2013. Phylogenetic conservatism of functional traits in  
572 microorganisms. *ISME J* 7:830-838.
- 573 31. Langille MG, Zaneveld J, Caporaso JG, McDonald D, Knights D, Reyes JA, Clemente JC,  
574 Burkepille DE, Vega Thurber RL, Knight R, Beiko RG, Huttenhower C. 2013. Predictive  
575 functional profiling of microbial communities using 16S rRNA marker gene sequences. *Nat*  
576 *Biotechnol* 31:814-821.
- 577 32. Seemann T. 2014. Prokka: rapid prokaryotic genome annotation. *Bioinformatics* 30:2068-2069.
- 578 33. Page AJ, Cummins CA, Hunt M, Wong VK, Reuter S, Holden MT, Fookes M, Falush D,  
579 Keane JA, Parkhill J. 2015. Roary: rapid large-scale prokaryote pan genome analysis.  
580 *Bioinformatics* 31:3691-3693.
- 581 34. Katoh K, Standley DM. 2013. MAFFT multiple sequence alignment software version 7:  
582 improvements in performance and usability. *Mol Biol Evol* 30:772-780.
- 583 35. Stamatakis A. 2014. RAxML version 8: a tool for phylogenetic analysis and post-analysis of  
584 large phylogenies. *Bioinformatics* 30:1312-1313.

- 585 36. Yu G, Lam TT, Zhu H, Guan Y. 2018. Two Methods for mapping and visualizing associated  
586 data on phylogeny using ggtree. *Mol Biol Evol* 35:3041-3043.
- 587 37. Letunic I, Bork P. 2011. Interactive Tree Of Life v2: online annotation and display of  
588 phylogenetic trees made easy. *Nucleic Acids Res* 39:W475-W478.
- 589 38. Pritchard L, Glover RH, Humphris S, Elphinstone JG, Toth IK. 2016. Genomics and taxonomy  
590 in diagnostics for food security: soft-rotting enterobacterial plant pathogens. *Analytical*  
591 *Methods* 8:12-24.
- 592 39. Eren AM, Maignien L, Sul WJ, Murphy LG, Grim SL, Morrison HG, Sogin ML. 2013.  
593 Oligotyping: differentiating between closely related microbial taxa using 16S rRNA gene data.  
594 *Methods Ecol Evol* 4:1111-1119.
- 595 40. Madeira F, Park YM, Lee J, Buso N, Gur T, Madhusoodanan N, Basutkar P, Tivey ARN,  
596 Potter SC, Finn RD, Lopez R. 2019. The EMBL-EBI search and sequence analysis tools APIs  
597 in 2019. *Nucleic Acids Res* 47:W636-W641.
- 598 41. Kwong WK, Moran NA. 2013. Cultivation and characterization of the gut symbionts of honey  
599 bees and bumble bees: description of *Snodgrassella alvi* gen. nov., sp. nov., a member of the  
600 family *Neisseriaceae* of the *Betaproteobacteria*, and *Gilliamella apicola* gen. nov., sp. nov., a  
601 member of *Orbaceae* fam. nov., *Orbales* ord. nov., a sister taxon to the order  
602 '*Enterobacteriales*' of the *Gammaproteobacteria*. *Int J Syst Evol Microbiol* 63:2008-2018.
- 603 42. Bolyen E, Rideout JR, Dillon MR, Bokulich NA, Abnet CC, Al-Ghalith GA, Alexander H,  
604 Alm EJ, Arumugam M, Asnicar F, Bai Y, Bisanz JE, Bittinger K, Brejnrod A, Brislawn CJ,  
605 Brown CT, Callahan BJ, Caraballo-Rodríguez AM, Chase J, Cope EK, Da Silva R, Diener C,  
606 Dorrestein PC, Douglas GM, Durall DM, Duvallet C, Edwardson CF, Ernst M, Estaki M,  
607 Fouquier J, Gauglitz JM, Gibbons SM, Gibson DL, Gonzalez A, Gorlick K, Guo J, Hillmann B,  
608 Holmes S, Holste H, Huttenhower C, Huttley GA, Janssen S, Jarmusch AK, Jiang L, Kaehler  
609 BD, Kang KB, Keefe CR, Keim P, Kelley ST, Knights D, Koester I, Kosciulek T, Kreps J,  
610 Langille MGI, Lee J, Ley R, Liu YX, Loftfield E, Lozupone C, Maher M, Marotz C, Martin  
611 BD, McDonald D, McIver LJ, Melnik AV, Metcalf JL, Morgan SC, Morton JT, Naimey AT,  
612 Navas-Molina JA, Nothias LF, Orchanian SB, Pearson T, Peoples SL, Petras D, Preuss ML,  
613 Pruesse E, Rasmussen LB, Rivers A, Robeson MS 2nd, Rosenthal P, Segata N, Shaffer M,  
614 Shiffer A, Sinha R, Song SJ, Spear JR, Swafford AD, Thompson LR, Torres PJ, Trinh P,  
615 Tripathi A, Turnbaugh PJ, Ul-Hasan S, van der Hooft JJJ, Vargas F, Vázquez-Baeza Y,  
616 Vogtmann E, von Hippel M, Walters W, Wan Y, Wang M, Warren J, Weber KC, Williamson  
617 CHD, Willis AD, Xu ZZ, Zaneveld JR, Zhang Y, Zhu Q, Knight R, Caporaso JG. 2019.  
618 Reproducible, interactive, scalable and extensible microbiome data science using QIIME 2. *Nat*  
619 *Biotechnol* 37:852-857.
- 620 43. Callahan BJ, McMurdie PJ, Rosen MJ, Han AW, Johnson AJ, Holmes SP. 2016. DADA2:  
621 High-resolution sample inference from Illumina amplicon data. *Nat Methods* 13:581-583.
- 622 44. Mirzajani A, Asharlous A, Kianpoor P, Jafarzadehpur E, Yekta A, Khabazkhoob M, Hashemi  
623 H. 2019. Repeatability of curvature measurements in central and paracentral corneal areas of  
624 keratoconus patients using Orbscan and Pentacam. *J Curr Ophthalmol* 31:382-386.
- 625 45. Soh EJY, Jaffé R, Ascher JS, Koch H, Medina LA, Moran NA, Kwong WK, Sing K-W. 2017.  
626 Dynamic microbiome evolution. *Science Advances* 3:e1600513.
- 627 46. Chen S, Zhou Y, Chen Y, Gu J. 2018. fastp: an ultra-fast all-in-one FASTQ preprocessor.  
628 *Bioinformatics* 34:i884-i890.

- 629 47. Rognes T, Flouri T, Nichols B, Quince C, Mahé F. 2016. VSEARCH: a versatile open source  
630 tool for metagenomics. *PeerJ* 4:e2584.
- 631 48. Zhang X, Li X, Su Q, Cao Q, Li C, Niu Q, Zheng H. 2019. A curated 16S rRNA reference  
632 database for the classification of honeybee and bumblebee gut microbiota. *Biodiversity Science*  
633 27:557-566.
- 634 49. Li H, Durbin R. 2010. Fast and accurate long-read alignment with Burrows-Wheeler transform.  
635 *Bioinformatics* 26(5):589-595.  
636



637

638

639 **FIG S1** The Shannon entropy across the remain marker genes of all *A. cerana Gilliamella*. The Shannon entropy  
640 value is subsequently averaged by a 20-bp slide-window at a 5-bp step. Dash lines represent the mean Shannon  
641 entropy values cross all sequences.

642

643



644

645

646

647

**FIG S2** All but *mhB* of the 15 marker genes produce five SDPs for *A. cerana Gilliamella* phylotype in concert with the whole-genome result.

648



649

650

651 **FIG S3** Histograms of average nucleotide identity values of the 3 marker genes from comparisons between strains  
652 belonging to the same SDPs (green) or different SDPs (red). Vertical black line indicates the threshold for  
653 bacterial SDPs taxonomy for the present method.

654

655



656

657

658 **FIG S4** MGAS accurately identifies the *A. cerana* *Gilliamella* SDPs in DNA mock samples. (A) Relative SDP  
659 abundances in mock samples revealed by MGAS. The results shown in the heatmap are the logarithms of the  
660 relative abundances percentage of the five representative strains of the five SDPs of *A. cerana* *Gilliamella*. Grey  
661 box indicates a relative abundance at zero. (B) Spearman correlation of SDP abundances in *A. cerana* *Gilliamella*  
662 communities revealed by sequencing against mock samples,  $p < 2.2e-16$ . The black line presents the linear  
663 regression of the MGAS results against SDP abundances in mock samples. The blue solid and gray dashed lines  
664 represent a 1: 1 line and the fitted exponential regression (with 95 % confidence interval shown in gray shade),  
665 respectively. (C) Repeatability of relative abundance between replicates of DNA mock samples.  $n = 6$ , ICC(C,1)  
666 is 0.936, 0.974 and 0.752 for *frr*, *NusA* and *PTH* genes, respectively.

667



668  
669  
670  
671  
672

**FIG S5** Rarefaction curves of detected bacterial SDPs in bacterial mock samples reach the saturation stage with increasing read numbers.

673



674

675

676

677

678

679

680

681

682

**FIG S6** Amplicon sequencing with the *PTH* gene showed high congruence to metagenomic sequencing at SDP-level analyses. (A) Relative abundances of *Gilliamella* SDPs revealed by MGAS (*PTH* gene) and metagenomics sequencing of *A. cerana* gut communities. (B) Spearman correlation coefficient between MGAS and metagenomics results, with  $R^2 = 0.97$ ,  $p < 2.2e-16$ . The black line presents the linear regression of the MGAS results in SDP abundances against those of metagenomics. The blue solid and gray dashed lines represent a 1: 1 line and the fitted exponential regression (with 95 % confidence interval shown in gray shade), respectively.



685 (Continued Table S1)

|                      |                      |         |                   |                             |                                                                         |      |         |               |
|----------------------|----------------------|---------|-------------------|-----------------------------|-------------------------------------------------------------------------|------|---------|---------------|
| <i>Sordgrassella</i> | <i>Sordgrassella</i> | B3809   | Stead_Accr_Advs_1 | <i>Apis cerana</i>          | China Caohu Town, Mengzi County, Henghe Prefecture, Yunnan              | 2,23 | 21      | JANFH00000000 |
| <i>Sordgrassella</i> | <i>Sordgrassella</i> | B3837   | Stead_Accr_Advs_1 | <i>Apis cerana</i>          | China Changqing National Nature Reserve, Yang County, Hanchong, Shaanxi | 2,04 | 31      | JANFH00000000 |
| <i>Sordgrassella</i> | <i>Sordgrassella</i> | wk8237A | Stead_Accr_Advs_1 | <i>Apis andrewmyerensis</i> | Singapore Hort Park                                                     | 2,32 | 21      | MEJH00000000  |
| <i>Sordgrassella</i> | <i>Sordgrassella</i> | wk8237B | Stead_Accr_Advs_1 | <i>Apis cerana</i>          | Singapore Clementi Park                                                 | 2,32 | 31      | MEJH00000000  |
| <i>Sordgrassella</i> | <i>Sordgrassella</i> | wk8298B | Stead_Accr_Advs_1 | <i>Apis cerana</i>          | Singapore Hort Park                                                     | 2,34 | 42      | MEJH00000000  |
| <i>Sordgrassella</i> | <i>Sordgrassella</i> | Q02     | Stead_Accr_1      | <i>Apis mellifera</i>       | USA: West Haven, CT                                                     | 1,60 | 299     | JAEH00000000  |
| <i>Sordgrassella</i> | <i>Sordgrassella</i> | A-10-12 | Stead_Accr_2      | <i>Apis mellifera</i>       | USA: Arizona                                                            | 2,50 | 63      | NAGY01000000  |
| <i>Sordgrassella</i> | <i>Sordgrassella</i> | A-11    | Stead_Accr_2      | <i>Apis mellifera</i>       | USA: Arizona                                                            | 2,43 | 122     | NAGY00000000  |
| <i>Sordgrassella</i> | <i>Sordgrassella</i> | A-11-12 | Stead_Accr_2      | <i>Apis mellifera</i>       | USA: Arizona                                                            | 2,50 | 90      | NAGY01000000  |
| <i>Sordgrassella</i> | <i>Sordgrassella</i> | A-11-12 | Stead_Accr_2      | <i>Apis mellifera</i>       | USA: Arizona                                                            | 2,50 | 58      | NAGY00000000  |
| <i>Sordgrassella</i> | <i>Sordgrassella</i> | A12     | Stead_Accr_2      | <i>Apis mellifera</i>       | USA: Arizona                                                            | 2,40 | 214     | NAGY00000000  |
| <i>Sordgrassella</i> | <i>Sordgrassella</i> | A2      | Stead_Accr_2      | <i>Apis mellifera</i>       | USA: Arizona                                                            | 2,43 | 84      | NAGY01000000  |
| <i>Sordgrassella</i> | <i>Sordgrassella</i> | A-2-12  | Stead_Accr_2      | <i>Apis mellifera</i>       | USA: Arizona                                                            | 2,50 | 75      | NAGY01000000  |
| <i>Sordgrassella</i> | <i>Sordgrassella</i> | A3      | Stead_Accr_2      | <i>Apis mellifera</i>       | USA: Arizona                                                            | 2,43 | 109     | NAGY01000000  |
| <i>Sordgrassella</i> | <i>Sordgrassella</i> | A5      | Stead_Accr_2      | <i>Apis mellifera</i>       | USA: Arizona                                                            | 2,43 | 120     | NAGY01000000  |
| <i>Sordgrassella</i> | <i>Sordgrassella</i> | A5-24   | Stead_Accr_2      | <i>Apis mellifera</i>       | USA: Arizona                                                            | 2,49 | 172     | NAGY01000000  |
| <i>Sordgrassella</i> | <i>Sordgrassella</i> | A-9-24  | Stead_Accr_2      | <i>Apis mellifera</i>       | USA: Arizona                                                            | 2,50 | 62      | NAGY01000000  |
| <i>Sordgrassella</i> | <i>Sordgrassella</i> | Aw-18   | Stead_Accr_2      | <i>Apis mellifera</i>       | USA: Arizona                                                            | 2,50 | 88      | NAGY01000000  |
| <i>Sordgrassella</i> | <i>Sordgrassella</i> | Aw-20   | Stead_Accr_2      | <i>Apis mellifera</i>       | USA: Arizona                                                            | 2,50 | 65      | NAGY01000000  |
| <i>Sordgrassella</i> | <i>Sordgrassella</i> | 11      | Stead_Accr_2      | <i>Apis mellifera</i>       | USA: Arizona                                                            | 2,39 | 381     | NAGY00000000  |
| <i>Sordgrassella</i> | <i>Sordgrassella</i> | ES2406  | Stead_Accr_2      | <i>Apis mellifera</i>       | Switzerland: Lucerne                                                    | 2,45 | 15      | QGL000000000  |
| <i>Sordgrassella</i> | <i>Sordgrassella</i> | J21     | Stead_Accr_2      | <i>Apis mellifera</i>       | USA: West Haven, CT                                                     | 2,33 | 456     | AVZ000000000  |
| <i>Sordgrassella</i> | <i>Sordgrassella</i> | MS1-3   | Stead_Accr_2      | <i>Apis mellifera</i>       | USA: Austin, TX                                                         | 2,50 | 93      | MEJH00000000  |
| <i>Sordgrassella</i> | <i>Sordgrassella</i> | N-23    | Stead_Accr_2      | <i>Apis mellifera</i>       | Norway: Ass                                                             | 2,42 | 128     | NAGY00000000  |
| <i>Sordgrassella</i> | <i>Sordgrassella</i> | N9      | Stead_Accr_2      | <i>Apis mellifera</i>       | Norway: Ass                                                             | 2,40 | 129     | NAGY01000000  |
| <i>Sordgrassella</i> | <i>Sordgrassella</i> | N-S1    | Stead_Accr_2      | <i>Apis mellifera</i>       | Norway: Ass                                                             | 2,42 | 98      | NAGY00000000  |
| <i>Sordgrassella</i> | <i>Sordgrassella</i> | N-S2    | Stead_Accr_2      | <i>Apis mellifera</i>       | Norway: Ass                                                             | 2,42 | 73      | NAGY01000000  |
| <i>Sordgrassella</i> | <i>Sordgrassella</i> | N-S4    | Stead_Accr_2      | <i>Apis mellifera</i>       | Norway: Ass                                                             | 2,42 | 38      | NAGY00000000  |
| <i>Sordgrassella</i> | <i>Sordgrassella</i> | N-S5    | Stead_Accr_2      | <i>Apis mellifera</i>       | Norway: Ass                                                             | 2,42 | 77      | NAGY00000000  |
| <i>Sordgrassella</i> | <i>Sordgrassella</i> | N-W4    | Stead_Accr_2      | <i>Apis mellifera</i>       | Norway: Ass                                                             | 2,42 | 75      | NAGY01000000  |
| <i>Sordgrassella</i> | <i>Sordgrassella</i> | N-W7    | Stead_Accr_2      | <i>Apis mellifera</i>       | Norway: Ass                                                             | 2,42 | 62      | NAGY01000000  |
| <i>Sordgrassella</i> | <i>Sordgrassella</i> | OH1     | Stead_Accr_2      | <i>Apis mellifera</i>       | USA: West Haven, CT                                                     | 1,37 | 401     | JAEH00000000  |
| <i>Sordgrassella</i> | <i>Sordgrassella</i> | P14     | Stead_Accr_2      | <i>Apis mellifera</i>       | USA: West Haven, CT                                                     | 1,31 | 385     | JAC000000000  |
| <i>Sordgrassella</i> | <i>Sordgrassella</i> | PE00171 | Stead_Accr_2      | <i>Apis mellifera</i>       | USA: West Haven, CT                                                     | 2,52 | 77      | MEJH00000000  |
| <i>Sordgrassella</i> | <i>Sordgrassella</i> | PE00178 | Stead_Accr_2      | <i>Apis mellifera</i>       | USA: West Haven, CT                                                     | 2,52 | 135     | MEJH00000000  |
| <i>Sordgrassella</i> | <i>Sordgrassella</i> | wk82    | Stead_Accr_2      | <i>Apis mellifera</i>       | USA: Austin, TX                                                         | 2,53 | Combing | CP07446       |
| <i>Sordgrassella</i> | <i>Sordgrassella</i> | N-53    | Stead_Accr_2      | <i>Apis mellifera</i>       | Norway: Ass                                                             | 2,46 | 79      | NAGY00000000  |
| <i>Sordgrassella</i> | <i>Sordgrassella</i> | wk8332  | Stead_Accr_2      | <i>Apis mellifera</i>       | Malaysia: Genting Highlands                                             | 2,49 | 80      | MEJH00000000  |
| <i>Sordgrassella</i> | <i>Sordgrassella</i> | wk8339  | Stead_Accr_2      | <i>Apis mellifera</i>       | Malaysia: Genting Highlands                                             | 2,50 | 27      | MEJH00000000  |
| <i>Sordgrassella</i> | <i>Sordgrassella</i> | wk89    | Stead_Accr_2      | <i>Apis mellifera</i>       | USA: West Haven, CT                                                     | 2,55 | 15      | MEJH00000000  |

686

**TABLE S2** Information of the marker genes.

| <b>PhyEco marker</b> | <b>Gene</b> | <b>Length/bp</b> |
|----------------------|-------------|------------------|
| B000079              | <i>frr</i>  | 558              |
| B000041              | <i>NusA</i> | 1,476            |
| B000103              | <i>PTH</i>  | 642              |
| B000063              | <i>RbfA</i> | 378              |
| B000080              | <i>RecR</i> | 606              |
| B000039              | <i>rnhB</i> | 627              |
| B000096              | <i>RibF</i> | 939              |
| B000086              | <i>RimM</i> | 531              |
| B000062              | <i>RsfS</i> | 315              |
| B000071              | <i>RuvA</i> | 609              |
| B000065              | <i>smpB</i> | 483              |
| B000032              | <i>truB</i> | 921              |
| B000082              | <i>miaA</i> | 912              |
| B000114              | <i>murB</i> | 1,011            |
| B000081              | <i>YebY</i> | 468              |

**TABLE S3** List of barcode sequences.

| <b>Barcode NO.</b> | <b>Forward seq (5'to 3')</b> | <b>Reverse seq (5'to 3')</b> |
|--------------------|------------------------------|------------------------------|
| B01                | ATCACG                       | ACTGAT                       |
| B02                | CGATGT                       | ATGAGC                       |
| B03                | TTAGGC                       | ATTCTT                       |
| B04                | TGACCA                       | CAAAAG                       |
| B05                | ACAGTG                       | CAACTA                       |
| B06                | GCCAAT                       | CACCGG                       |
| B07                | CAGATC                       | CACGAT                       |
| B08                | ACTTGA                       | CACTCA                       |
| B09                | GATCAG                       | CAGGCG                       |
| B10                | TAGCTT                       | CATGGC                       |
| B11                | GGCTAC                       | CATTTT                       |
| B12                | CTTGTA                       | CCAACA                       |
| B13                | AGTCAA                       | CGGAAT                       |
| B14                | AGTTCC                       | CTAGCT                       |
| B15                | ATGTCA                       | CTATAC                       |
| B16                | CCGTCC                       | CTCAGA                       |
| B17                | GTAGAG                       | GACGAC                       |
| B18                | GTCCGC                       | TAATCG                       |
| B19                | GTGAAA                       | TACAGC                       |
| B20                | GTGGCC                       | TATAAT                       |
| B21                | GTTTCG                       | TCATTC                       |
| B22                | CGTACG                       | TCCCGA                       |
| B23                | GAGTGG                       | TCGAAG                       |
| B24                | GGTAGC                       | TCGGCA                       |

**TABLE S4** Mixing ratio of mock samples.

| SampleID | Mixing ratio |       |       |       |       | Barcode NO. |
|----------|--------------|-------|-------|-------|-------|-------------|
|          | B2776        | B2889 | B3801 | B3172 | B3788 |             |
| S01      | 20.00        | 20.00 | 20.00 | 20.00 | 20.00 | B01         |
| S02      | 25.00        | 25.00 | 0.00  | 25.00 | 25.00 | B02         |
| S03      | 0.00         | 25.00 | 25.00 | 25.00 | 25.00 | B03         |
| S04      | 25.00        | 0.00  | 25.00 | 25.00 | 25.00 | B04         |
| S05      | 25.00        | 25.00 | 25.00 | 0.00  | 25.00 | B05         |
| S06      | 25.00        | 25.00 | 25.00 | 25.00 | 0.00  | B06         |
| S07      | 33.33        | 33.33 | 0.00  | 33.33 | 0.00  | B07         |
| S08      | 0.00         | 33.33 | 0.00  | 33.33 | 33.33 | B08         |
| S09      | 0.00         | 0.00  | 33.33 | 33.33 | 33.33 | B09         |
| S10      | 33.33        | 0.00  | 33.33 | 0.00  | 33.33 | B10         |
| S11      | 33.33        | 33.33 | 33.33 | 0.00  | 0.00  | B11         |
| S12      | 24.39        | 24.39 | 2.44  | 24.39 | 24.39 | B12         |
| S13      | 24.94        | 24.94 | 0.25  | 24.94 | 24.94 | B13         |
| S14      | 24.99        | 24.99 | 0.02  | 24.99 | 24.99 | B14         |
| S15      | 20.00        | 20.00 | 20.00 | 20.00 | 20.00 | B15         |
| S16      | 1.00         | 9.00  | 50.00 | 10.00 | 30.00 | B16         |
| S17      | 50.00        | 1.00  | 30.00 | 9.00  | 10.00 | B17         |
| S18      | 30.00        | 50.00 | 10.00 | 1.00  | 9.00  | B18         |
| S19      | 10.00        | 30.00 | 9.00  | 50.00 | 1.00  | B19         |
| S20      | 9.00         | 10.00 | 1.00  | 30.00 | 50.00 | B20         |
| S21      | 0.00         | 0.00  | 10.00 | 90.00 | 0.00  | B21         |
| S22      | 0.00         | 0.00  | 1.00  | 99.00 | 0.00  | B22         |
| S23      | 0.00         | 0.00  | 0.10  | 99.90 | 0.00  | B23         |
| S24      | 0.00         | 0.00  | 50.00 | 50.00 | 0.00  | B24         |
| D01      | 20.00        | 20.00 | 20.00 | 20.00 | 20.00 | B01         |
| D02      | 20.00        | 20.00 | 20.00 | 20.00 | 20.00 | B02         |
| D03      | 20.00        | 20.00 | 20.00 | 20.00 | 20.00 | B03         |
| D04      | 20.00        | 20.00 | 20.00 | 20.00 | 20.00 | B04         |
| D05      | 20.00        | 20.00 | 20.00 | 20.00 | 20.00 | B05         |
| D06      | 20.00        | 20.00 | 20.00 | 20.00 | 20.00 | B06         |
| D07      | 90.00        | 9.00  | 0.90  | 0.09  | 0.01  | B07         |
| D08      | 9.00         | 0.90  | 0.09  | 0.01  | 90.00 | B08         |
| D09      | 0.90         | 0.09  | 0.01  | 90.00 | 9.00  | B09         |
| D10      | 0.09         | 0.01  | 90.00 | 9.00  | 0.90  | B10         |
| D11      | 0.09         | 0.01  | 90.00 | 9.00  | 0.90  | B11         |
| D12      | 0.01         | 90.00 | 9.00  | 0.90  | 0.09  | B12         |
| D13      | 90.00        | 9.00  | 0.90  | 0.09  | 0.01  | B13         |
| D14      | 9.00         | 0.90  | 0.09  | 0.01  | 90.00 | B14         |
| D15      | 0.90         | 0.09  | 0.01  | 90.00 | 9.00  | B15         |
| D16      | 0.09         | 0.01  | 90.00 | 9.00  | 0.90  | B16         |
| D17      | 0.09         | 0.01  | 90.00 | 9.00  | 0.90  | B17         |

(Continued Table S4)

|     |       |       |       |       |       |     |
|-----|-------|-------|-------|-------|-------|-----|
| D18 | 0.01  | 90.00 | 9.00  | 0.90  | 0.09  | B18 |
| D19 | 0.00  | 0.00  | 1.64  | 16.39 | 81.97 | B19 |
| D20 | 0.00  | 0.00  | 1.64  | 16.39 | 81.97 | B20 |
| D21 | 0.00  | 1.64  | 16.39 | 81.97 | 0.00  | B21 |
| D22 | 1.64  | 16.39 | 81.97 | 0.00  | 0.00  | B22 |
| D23 | 16.39 | 81.97 | 0.00  | 0.00  | 1.64  | B23 |
| D24 | 81.97 | 0.00  | 0.00  | 1.64  | 16.39 | B24 |

Note: B2776, B2889, B3801, B3172 and B3788 are the representative strain of Acer\_Giliia\_1 to Acer\_Giliia\_5, respectively.

**TABLE S5** Statistics of data outputs.

| <b>LibraryID</b> | <b>Raw reads</b> | <b>Clean reads</b> | <b>Raw base/G</b> | <b>Clean base/G</b> | <b>Effective rate/%</b> | <b>Q20/%</b> | <b>Q30/%</b> | <b>GC content/%</b> |
|------------------|------------------|--------------------|-------------------|---------------------|-------------------------|--------------|--------------|---------------------|
| f1S01-f1S24      | 2,910,358        | 2,904,839          | 0.87              | 0.87                | 99.81                   | 98.96        | 96.8         | 42.92               |
| f2S01-f2S24      | 4,370,025        | 4,362,026          | 1.31              | 1.31                | 99.82                   | 98.99        | 96.88        | 42.85               |
| f3S01-f3S24      | 3,971,727        | 3,966,181          | 1.19              | 1.19                | 99.86                   | 98.34        | 94.65        | 42.84               |
| N1S01-N1S24      | 3,101,708        | 3,097,334          | 0.93              | 0.93                | 99.86                   | 98.83        | 96.33        | 38.67               |
| N2S01-N2S24      | 3,455,304        | 3,451,312          | 1.04              | 1.04                | 99.88                   | 97.96        | 93.59        | 38.66               |
| N3S01-N3S24      | 2,893,355        | 2,889,594          | 0.87              | 0.87                | 99.87                   | 97.8         | 93.25        | 38.64               |
| P1S01-P1S24      | 5,446,708        | 5,439,697          | 1.63              | 1.63                | 99.87                   | 99.1         | 96.48        | 36.74               |
| P2S01-P2S24      | 2,698,030        | 2,694,490          | 0.81              | 0.81                | 99.87                   | 98.97        | 96.29        | 36.88               |
| P3S01-P3S24      | 3,377,356        | 3,371,139          | 1.01              | 1.01                | 99.82                   | 97.95        | 93.16        | 37.08               |
| fD01-fD24        | 3,599,515        | 3,595,846          | 1.08              | 1.08                | 99.9                    | 98.41        | 95.28        | 42.44               |
| ND01-ND24        | 4,399,592        | 4,393,529          | 1.32              | 1.32                | 99.86                   | 98.42        | 95.02        | 38.73               |
| PD01-PD24        | 3,387,737        | 3,380,942          | 1.02              | 1.01                | 99.8                    | 98.53        | 95.13        | 36.64               |
| fB0061-fB14781   | 5,441,182        | 5,434,806          | 1.63              | 1.63                | 99.88                   | 99.24        | 97.36        | 42.25               |
| PB0061-PB14781   | 3,591,409        | 3,587,252          | 1.08              | 1.08                | 99.88                   | 98.8         | 95.75        | 36.55               |

Note: 1. f1 - f3, N1 - N3 and P1 - P3 represent the three replicates for *frr*, *NusA* and *PTH* gene sequencing, and S01 - S24 are mock samples with different ratio of mixing bacterial cells shown in Table S4.

2. f, N and P represent the *frr*, *NusA* and *PTH* gene sequencing, and D01 - D24 are mock sample with different ratio of mixing bacterial DNA shown in Table S4.

3. f and P represent the *frr* and *PTH* gene sequencing, and BXXXX present *Apis cerana* gut sample

**TABLE S6** Summary of read processing and data obtained from marker gene, 16S V4 amplicon and metagenomic sequencing of honey bee guts.

| Gut ID | Raw PE reads |            |            |            | Joined and filtered reads |            |            |           | <i>Gilliamella</i> reads |        |
|--------|--------------|------------|------------|------------|---------------------------|------------|------------|-----------|--------------------------|--------|
|        | 16S          | <i>frr</i> | <i>PTH</i> | Meta       | 16S                       | <i>frr</i> | <i>PTH</i> | Meta      | 16S                      | Meta   |
| B0061  | 84,584       | 358,851    | 65,424     | 33,687,518 | 82,760                    | 311,842    | 60,964     | 5,159,739 | 25,700                   | 3,185  |
| B0070  | 85,169       | 253,390    | 94,393     | 37,685,288 | 83,491                    | 223,179    | 91,436     | 5,909,974 | 47,892                   | 7,661  |
| B0108  | 83,908       | 349,570    | 123,368    | 45,115,102 | 82,132                    | 344,248    | 121,018    | 4,242,595 | 39,424                   | 2,189  |
| B0120  | 85,368       | 389,432    | 29,023     | 34,543,934 | 83,267                    | 262,273    | 28,277     | 4,523,366 | 22,741                   | 815    |
| B0154  | 83,691       | 289,878    | -          | 34,969,488 | 81,143                    | 226,310    | -          | 4,622,933 | 26,346                   | 1,086  |
| B0174  | 84,281       | 361,728    | 75,882     | 38,471,836 | 81,979                    | 287,357    | 68,222     | 6,058,633 | 18,258                   | 243    |
| B14756 | -            | 224,748    | 118,334    | 21,491,068 | -                         | 194,850    | 114,236    | 4,622,933 | -                        | 17,472 |
| B14757 | -            | 354,956    | 158,879    | 22,959,909 | -                         | 328,188    | 156,087    | 4,622,933 | -                        | 5,546  |
| B14758 | -            | 277,823    | 165,638    | 24,408,709 | -                         | 224,100    | 160,741    | 9,658,926 | -                        | 4,182  |
| B14779 | -            | 342,928    | 151,481    | 23,802,654 | -                         | 285,197    | 146,421    | 7,922,065 | -                        | 8,133  |
| B14780 | -            | 301,064    | 48,088     | 23,495,452 | -                         | 272,069    | 47,247     | 7,123,654 | -                        | 3,064  |
| B14781 | -            | 291,415    | 71,187     | 22,381,871 | -                         | 237,037    | 68,190     | 9,626,197 | -                        | 3,686  |

Note: “16S” indicates 16S V4; “Meta” indicates metagenomic; “-” indicates no test.
